# Supplementary material for: Anti-PD-1 immunotherapy leads to tuberculosis reactivation via dysregulation of TNF-α
Source: eLife. 2020 Feb 24;9:e52668. doi: 10.7554/eLife.52668 (PMC7058383; doi:10.7554/eLife.52668)
Supplement: Source data 1. [file elife-52668-data1.xlsx]

## Sheet: Figure 1Ai
Blood	Lung
3.19	32.5
13.5	5.31
18.8	9.16
27.8	55.7
12.7	6.41
9.65	3.62
14.1	7.77
2.56	12.5
0.28	0.07
10.3	10.1
0.31	4.92
18.8	50.5
17.6	1.78
17.2	38
6.7	33.4
2.88	51.5
1.29	26
5.64	30.8
8.19	0.534
1.8	3.32
4.44	0.381
12.9	11.5
1.57	5.16
3.1	18.8
	1.3
	17.5
	15.5
	6.19
	17
	15.6
	6.39
	11.5
	18.5
	13.6
	12

## Sheet: Figure 1A ii
Blood	Lung
2.58	42.1
6.05	0
8.1	36
17	1.86
13.4	8.67
8.29	4.19
2.14	6.45
0.46	0.01
17	16.3
5.82	74.1
11.3	85.7
29.2	0.87
15.3	45.5
9.49	36.5
1.32	56.4
1.08	31.6
4.95	45.7
3.67	0.391
3.18	5.68
4.6	0.326
27	13.4
3.28	8.13
4.35	22.5
	0.167
	11.2
	22.6
	6.2
	24.3
	18.7
	14
	14.4
	24.8
	14.4
	9.98

## Sheet: Figure 2Bi 
	CD103+CD69-	CD103+CD69+	CD103-CD69+	CD103-CD69-
024-09-0290	4.49	9.17	57.3	29.1
024-09-0293	3.02	5.94	51.1	40
024-09-0302	1.01	18.1	55.5	25.4
024-06-0301	1.05	11.7	65.4	21.9
024-06-0305	1.35	6.9	48.6	43.2
06-0321	0.611	5.3	76.4	17.7
06-0324	0.547	17.8	56.4	25.2
06-0325	5.06	10.8	41.1	43
06-0328	3.56	4.11	52.9	39.5
06-0329	0.847	11.2	71.8	16.1
KDH 080818	2.62	5.26	68.1	24
06-0332	3.2	32.1	50.7	14
06-0333	0.502	3.42	71.8	24.3

## Sheet: Figure 2Bii
	CD103+CD69-	CD103+CD69+	CD103-CD69+	CD103-CD69-
024-09-0290	8.8	47.6	33.2	10.3
024-09-0293	3.07	24.5	49.6	22.8
024-09-0302	6.55	80.8	8.97	3.68
024-06-0301	5.83	47.8	39.4	7.01
024-06-0305	5.51	31.9	40.5	22.1
06-0321	4.64	49.6	35.2	10.6
06-0324	2.98	65.6	14.7	16.7
06-0325	6.94	23.3	26.5	43.3
06-0328	26.6	25.9	16	31.6
06-0329	7	43.6	33.6	15.7
KDH 080818	7.47	37.7	42.4	12.4
06-0332	7.51	56.4	23.6	12.5
06-0333	2.88	42.4	36.6	18.2

## Sheet: Figure 1 FS1i
	CD103+CD69-	CD103+CD69+	CD103-CD69+	CD103-CD69-
09-0291	0.958	0.0443	2.32	96.7
09-0301	0.753	0	0.878	98.4
06-0304	0.882	0.14	11.3	87.7
09-0299	0.326	0.138	20.7	78.8
09-0298	0.324	0	16.7	83
06-0299	0.234	0	19.7	80.1
06-0301	0.62	0.0978	7.4	91.9
06-0306	0.56	0.143	14.3	85
09-0290	17.9	0.289	0.867	80.9
09-0292	1.52	0.0123	0.725	97.7
09-0300	1.18	0.602	31.5	66.7
06-0305	0.673	0.153	11.5	87.6
09-0293	0.367	0.00565	2.92	96.7
06-0302	14	0	5.49	80.5
09-0302	2.23	0.262	8.41	89.1
09-0303	0.345	0.069	9.94	89.6

## Sheet: Figure1 FS1ii
	CD103+CD69-	CD103+CD69+	CD103-CD69+	CD103-CD69-
09-0291	17.4	1.7	6.93	73.9
09-0301	3.9	0.269	4.7	91.1
06-0304	3.58	0.657	16.4	79.4
09-0299	3.98	2.09	42.4	51.6
09-0298	6.78	1.45	24.3	67.4
06-0299	1.89	1.66	51.6	44.9
06-0301	1.38	0.275	14.9	83.5
06-0306	2.2	0.604	31.4	65.8
09-0290	3.48	0.87	19.1	76.5
09-0292	7.67	0.572	5.38	86.4
09-0300	1.65	2.09	61.4	34.8
06-0305	1.49	0.646	28.6	69.2
09-0293	2.47	0.12	3.81	93.6
06-0302	9.79	2.1	10.5	77.6
09-0302	7.22	2.71	12.7	77.3
09-0303	5.75	0.793	33.6	59.9

## Sheet: Figure 2B
	Normoxia									Hypoxia
Control	1	1	1	1	1	1	1	1	1	1	1	1	1	1	1	1	1	1
PD-1	0.798512	0.335167	0.570987	0.686791	0.619028	0.965294	0.097849	0.061087	0.235106	2.43569	1.24912	1.38676	1.17209	2.77095	0.144077	0.892786	0.037248	5.57474
PD-L1	3.9496	4.67652	3.20195	13.9095	17.1505	13.3835	6.23575	4.17134	9.89052	2.29759	3.02597	2.58511	13.7797	32.0524	4.73581	10.7709	6.75088	14.791
PD-L2	3.93305	4.59284	3.14735	6.9648	7.92216	6.95484	2.66578	3.5739	5.78129	3.53159	4.2141	5.39085	15.7801	32.9669	11.4538	24.4877	12.4144	36.5611

## Sheet: Figure 2C
	Media	Normoxia	Hypoxia
CD3+CD4+	100	112.892	191.566
	100	129.565	137.826
	100	116.049	120.494
	100	162.205	328.346

## Sheet: Figure 2D
	Media	Normoxia	Hypoxia
CD3+CD8+	100	103.053	180.153
	100	118.631	119.392
	100	121.607	121.607
	100	286.029	421.324

## Sheet: Figure 2E
	Media	Normoxia	Hypoxia
CD14+CD11b+	100	140.709	331.25
	100	156.708	166.065
	100	152.695	157.186
	100	184.772	250.254

[truncated: 23 more sheets: Figure 2F, Figure 2G, Figure 2 FS1, Figure 2 FS2A, Figure 2 FS2B, Figure 3A, Figure 3B, Figure 3C, Figure 3D, Figure 3E, Figure 3F, Figure 3 FS1, Figure 4 and FS1 and FS2, Figure 4 FS3A, Figure 4 FS3B, Figure 5A,B and C, Figure 5D, Figure 5E, Figure 5 FS1, Figure 5 FS2 …]
