# Supplementary material for: Anti-PD-1 immunotherapy leads to tuberculosis reactivation via dysregulation of TNF-α
Source: eLife journal article supplement (doi:10.7554/elife.52668), 2020-02-24
Supplement: supp [file elife_poa_e52668_Figure_1_figure_supplement_1.pdf › elife_poa_e52668_Figure_1_figure_supplement_1.pdf]

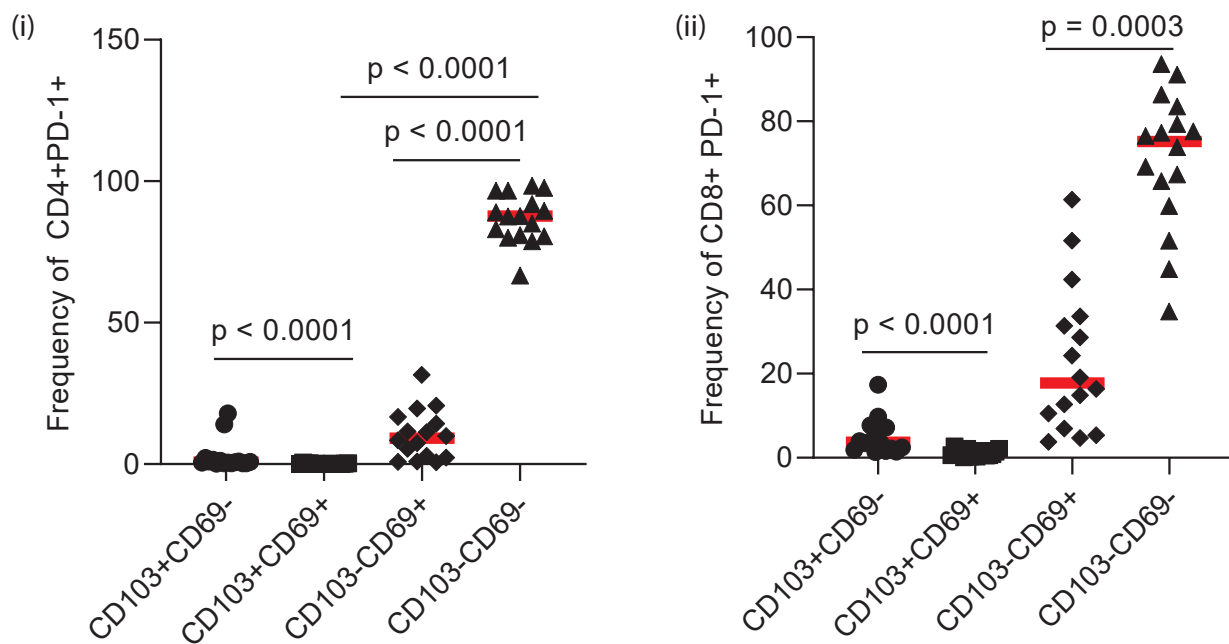

**Figure 1-figure supplement 1:** PD-1 expression on peripheral CD4<sup>+</sup> and CD8<sup>+</sup> T-cells is predominantly on CD103- and CD69-negative cells. Significance was analyzed by one-tailed unpaired Mann-Whitney test.
