# Supplementary material for: Anti-PD-1 immunotherapy leads to tuberculosis reactivation via dysregulation of TNF-α
Source: eLife journal article supplement (doi:10.7554/elife.52668), 2020-02-24
Supplement: supp [file elife_poa_e52668_Figure_1_figure_supplement_2.pdf › elife_poa_e52668_Figure_1_figure_supplement_2.pdf]

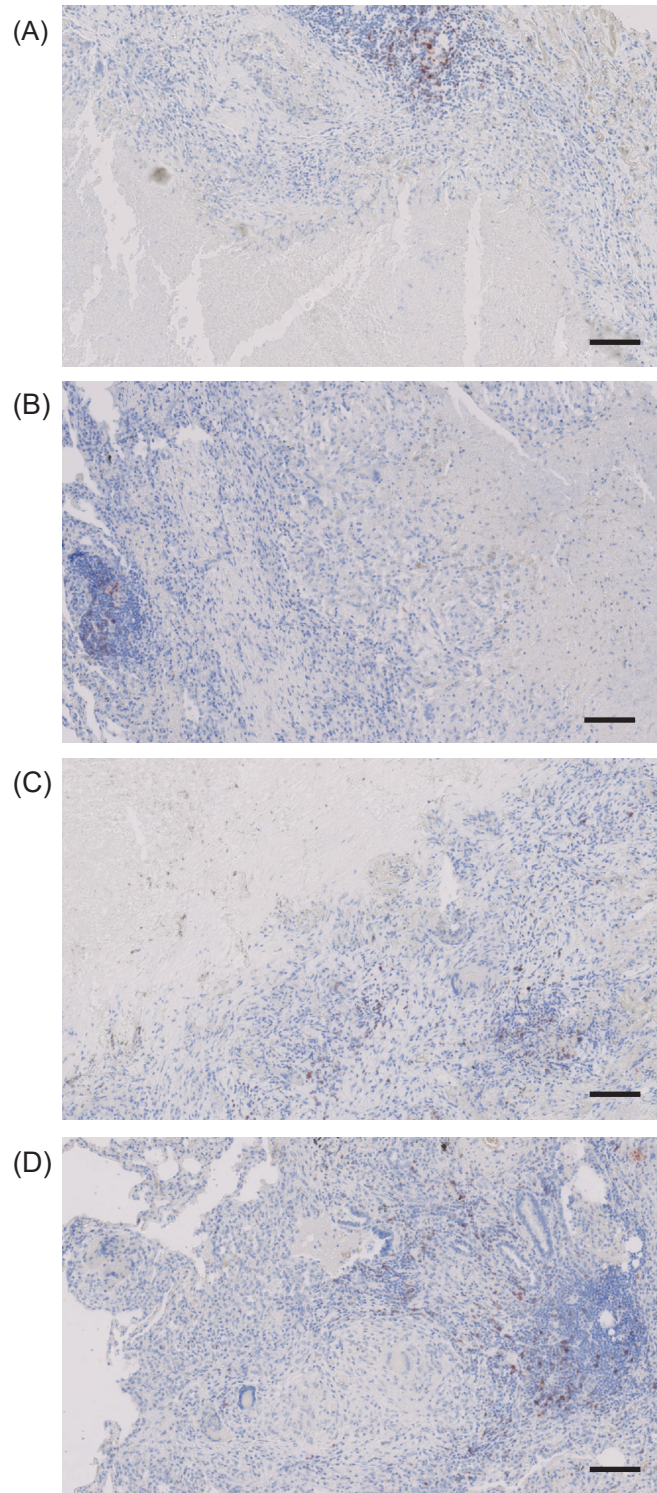

**Figure 1–figure supplement 2:** PD-1 expressing cells are absent in the immediate region surrounding caseous necrosis in human TB granulomas. Images from four different clinical samples are presented. Scale bar 100 $\mu$ m.
