# Supplementary material for: Anti-PD-1 immunotherapy leads to tuberculosis reactivation via dysregulation of TNF-α
Source: eLife journal article supplement (doi:10.7554/elife.52668), 2020-02-24
Supplement: supp [file elife_poa_e52668_Figure_2_figure_supplement_1.pdf › elife_poa_e52668_Figure_2_figure_supplement_1.pdf]

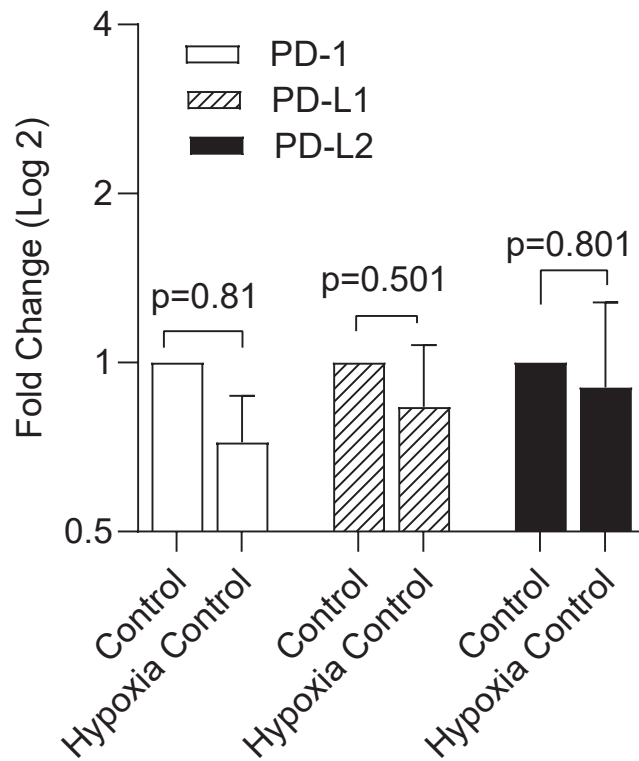

**Figure 2–figure supplement 1:** Hypoxia alone has no significant effect on expression of the PD-1/PDL-1/2 axis. Gene expression PD-1 and its ligands in uninfected cells was compared between normoxic and hypoxic conditions in the microsphere model. RNA was extracted from uninfected PBMCs and relative expression investigated by qRT-PCR at day 4. Open bars PD-1, filled bars PD-L1 and black bars PD-L2 respectively. Results were normalised against the housekeeping genes GAPDH,  $\beta$ -Microbulin and FANTA and showed similar results. No significant changes in gene expression were noted in uninfected microspheres.  $\beta$ -microglobulin used for the analysis presented.
