# Supplementary material for: Anti-PD-1 immunotherapy leads to tuberculosis reactivation via dysregulation of TNF-α
Source: eLife journal article supplement (doi:10.7554/elife.52668), 2020-02-24
Supplement: supp [file elife_poa_e52668_Figure_2_figure_supplement_2.pdf › elife_poa_e52668_Figure_2_figure_supplement_2.pdf]

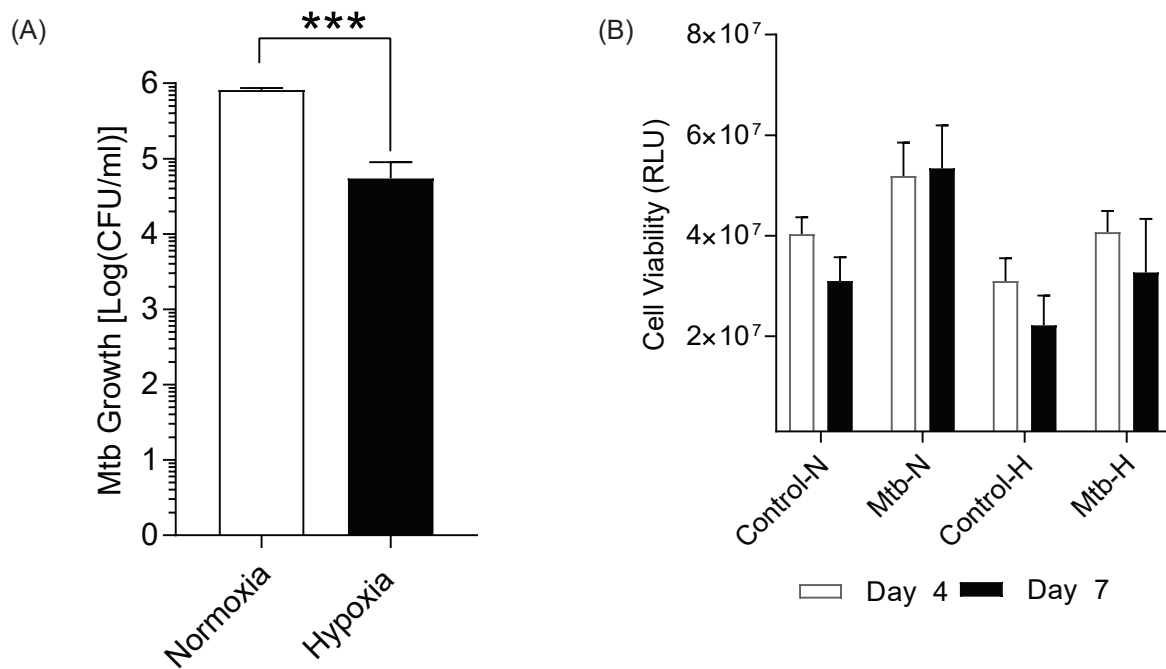

**Figure 2–figure supplement 2A:** (A) Mtb H37Rv ffluc+ growth in 1% hypoxia. Microspheres were decapsulated in a media containing 5mM EDTA and 0.1% saponin at day 14. The lysate was centrifuged, re-suspended in 1ml PBS, serially diluted and grown in Middlebrook 7H11 media for 3 weeks before colony counting. (B) Host cell viability using 3D CytosGlo viability assay (Promega) shows no significant difference between normoxia (open bars) and hypoxia (filled bars) at day 4 and day 7.
