# Supplementary material for: Anti-PD-1 immunotherapy leads to tuberculosis reactivation via dysregulation of TNF-α
Source: eLife journal article supplement (doi:10.7554/elife.52668), 2020-02-24
Supplement: supp [file elife_poa_e52668_Figure_3_figure_supplement_1.pdf › elife_poa_e52668_Figure_3_figure_supplement_1.pdf]

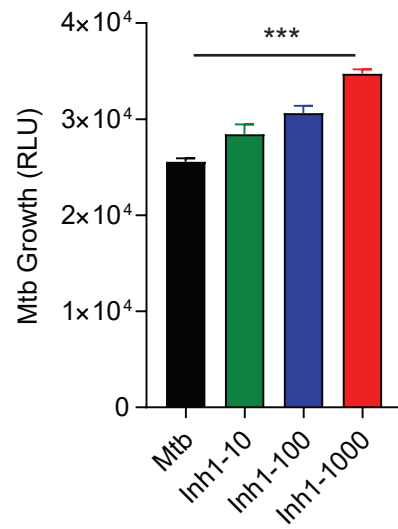

**Figure 3—figure supplement 1:** Small chemical inhibition of PD-1/PD-L1 interaction in 1% hypoxia measured at day 14 shows a dose-dependent increase in Mtb growth with PD-1 inhibition. \*\*\*  $p < 0.0001$  with one-way ANOVA with Dunnett's multiple comparison test.
