# Supplementary material for: Anti-PD-1 immunotherapy leads to tuberculosis reactivation via dysregulation of TNF-α
Source: eLife journal article supplement (doi:10.7554/elife.52668), 2020-02-24
Supplement: supp [file elife_poa_e52668_Figure_4_figure_supplement_1.pdf › elife_poa_e52668_Figure_4_figure_supplement_1.pdf]

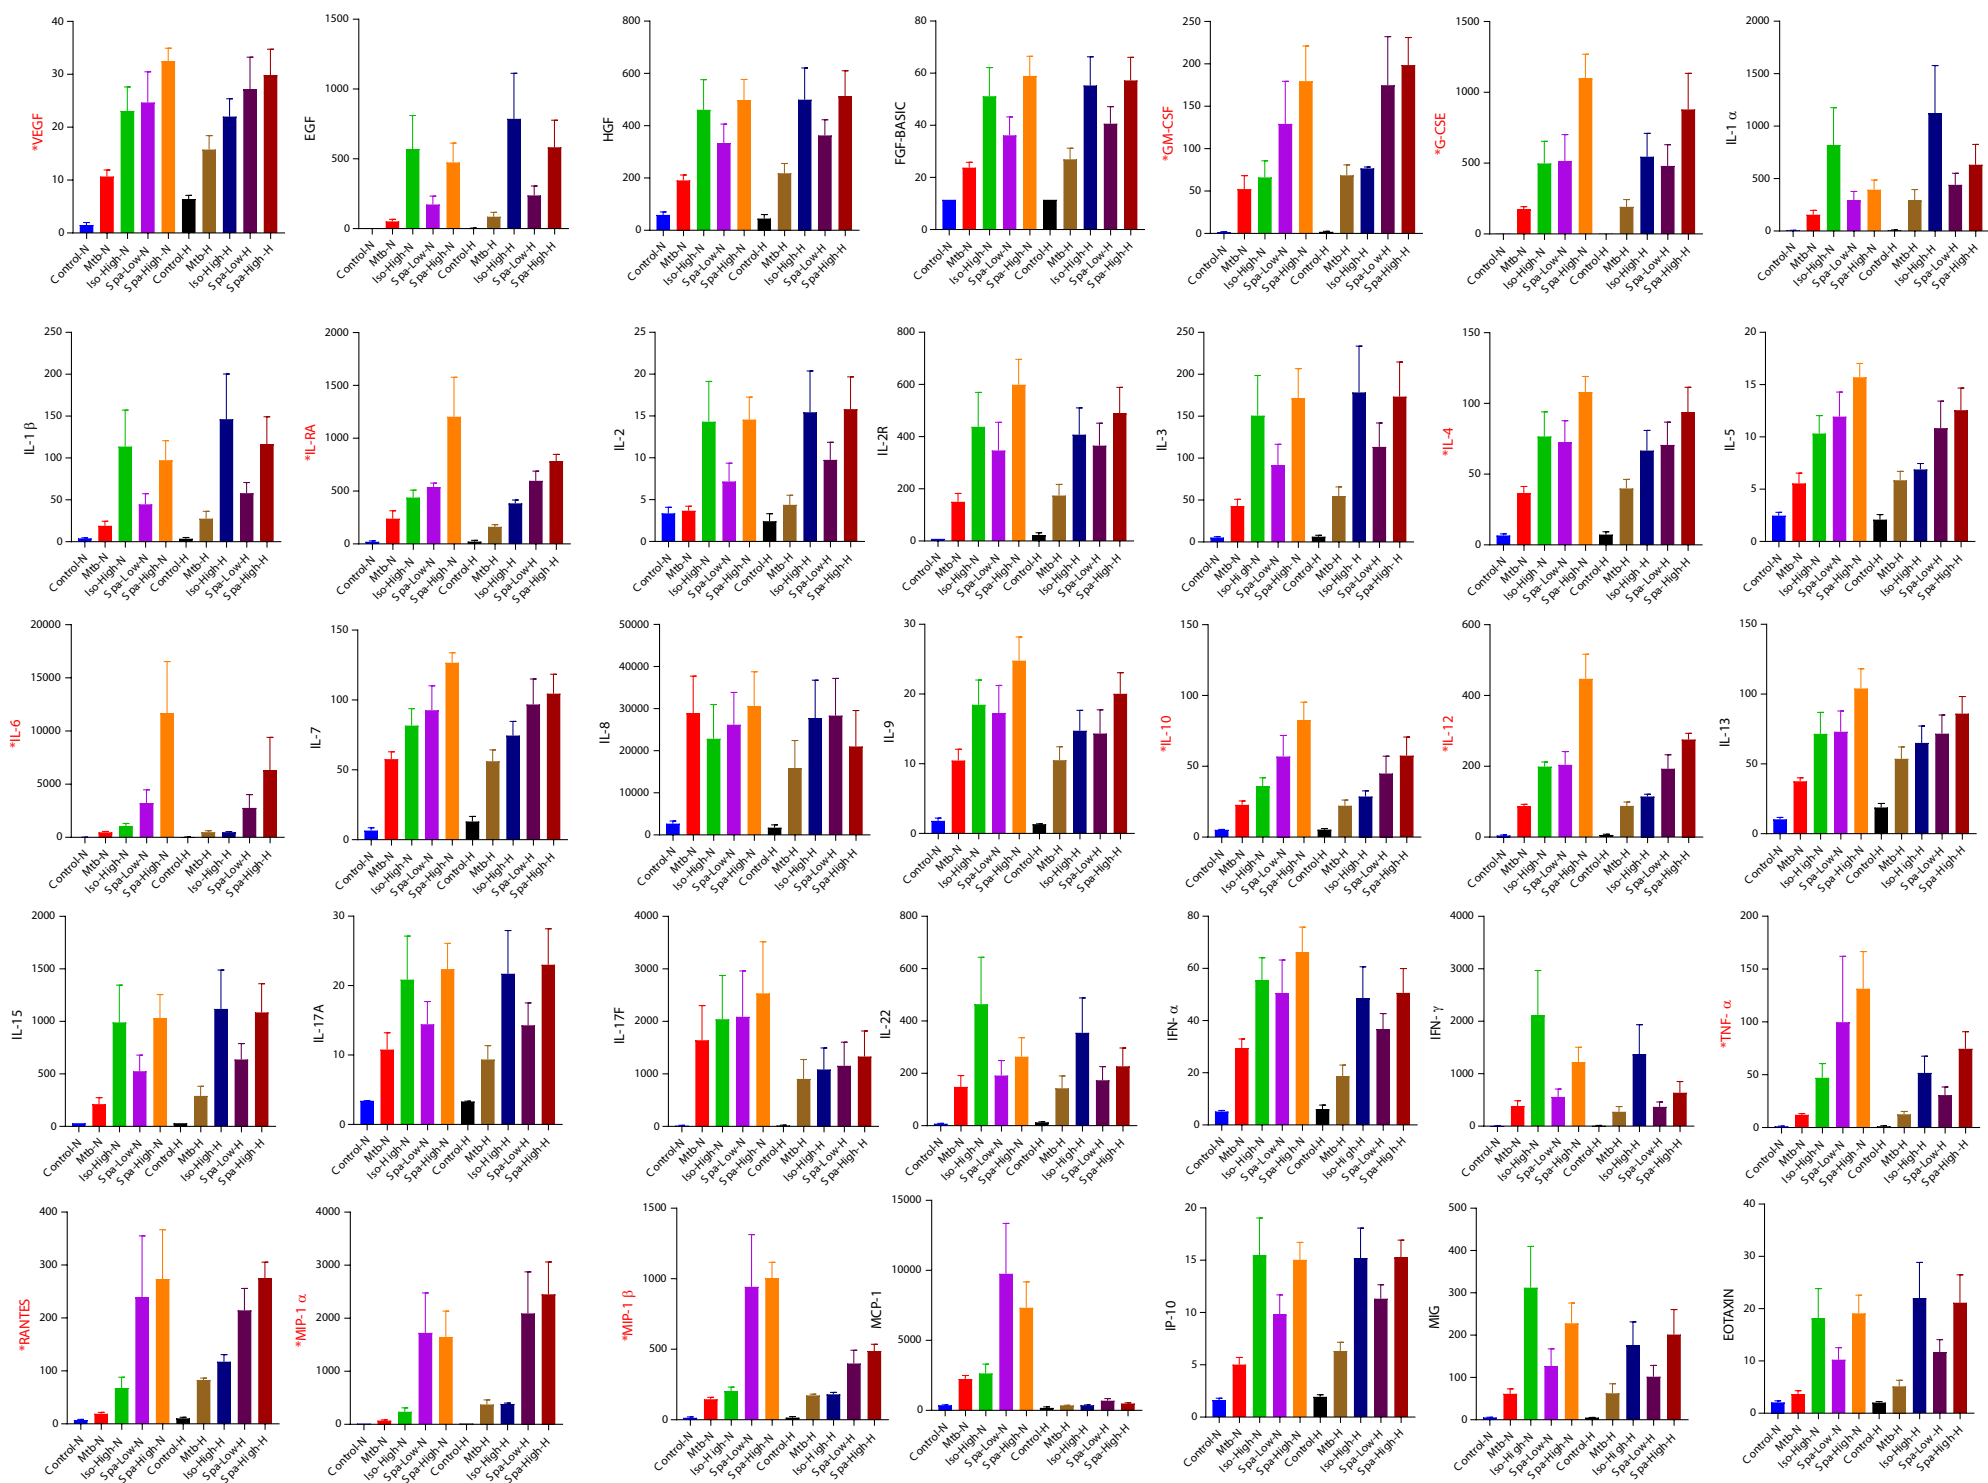

Figure 4-figure supplement 1 (legend overleaf)

**Figure 4–figure supplement 1:** Cytokine accumulation around microspheres after inhibition of PD-1/PD-L1 signalling with Spartalizumab, a humanized IgG4 anti-PD1 monoclonal antibody at 20 and 200µg/ml in normoxia (N) and 1% hypoxia (H). Supernatants were collected at day 14 and a Luminex 35-multiplex assay was performed. The experiment was performed twice with three replicates. Concentrations are in pg/ml. Labels in red correspond to significantly raised cytokine values. Red font: Significance \*\*p<0.001.
