# Supplementary material for: Anti-PD-1 immunotherapy leads to tuberculosis reactivation via dysregulation of TNF-α
Source: eLife journal article supplement (doi:10.7554/elife.52668), 2020-02-24
Supplement: supp [file elife_poa_e52668_Figure_4_figure_supplement_2.pdf › elife_poa_e52668_Figure_4_figure_supplement_2.pdf]

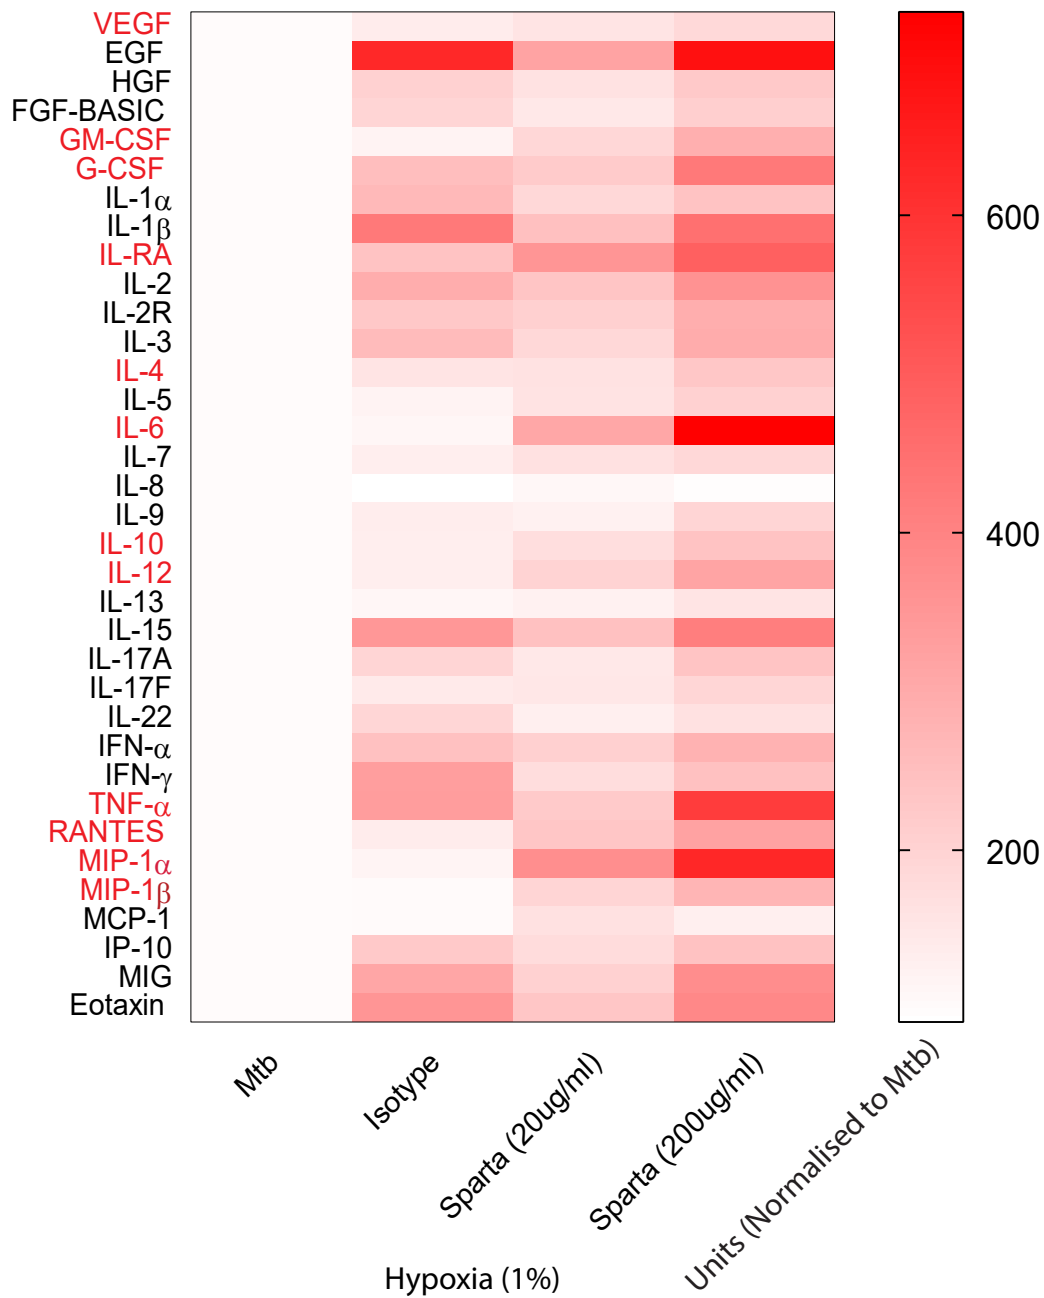

**Figure 4—figure supplement 2:** PD-1 inhibition increases secretion of multiple cytokines and growth factors in 1% hypoxia. Supernatants were collected at day 14 and accumulation of cytokines and growth factors was analysed by Luminex 35-multiplex assay. Concentrations were normalized to secretion by Mtb infected microspheres to demonstrate relative fold change, and individual concentrations are shown in Supplementary figure 5. The experiment was performed twice with three replicates. Red font: \*\* p<0.001 for Spartalizumab versus Isotype control.
