# Supplementary material for: Anti-PD-1 immunotherapy leads to tuberculosis reactivation via dysregulation of TNF-α
Source: eLife journal article supplement (doi:10.7554/elife.52668), 2020-02-24
Supplement: supp [file elife_poa_e52668_Figure_4_figure_supplement_3.pdf › elife_poa_e52668_Figure_4_figure_supplement_3.pdf]

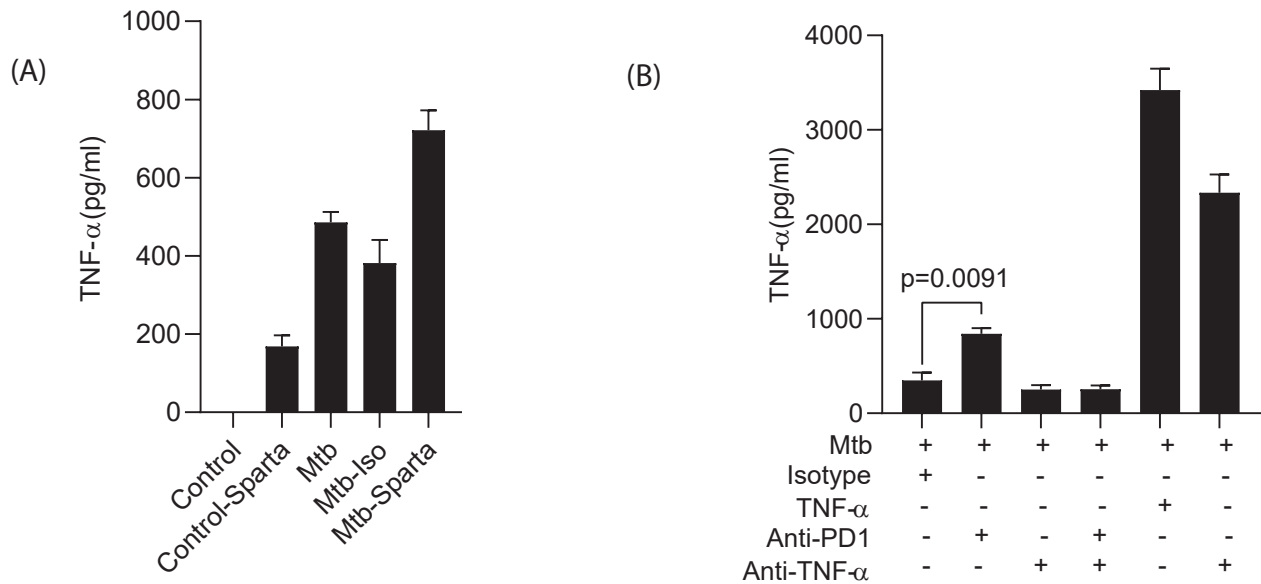

**Figure 4—figure supplement 3:** Spartalizumab induces TNF- $\alpha$  secretion in uninfected and infected microspheres, which is neutralised by anti-TNF- $\alpha$ . PBMCs which were uninfected or infected with Mtb were encapsulated in alginate-collagen matrix after pre- incubation in Spartalizumab at 200 $\mu$ g/ml. The supernatant was collected to measure TNF- $\alpha$  secretion at day 7. (A) Spartalizumab induces TNF- $\alpha$  secretion in uninfected cells above background, which is accentuated with Mtb infection. (B) Anti-PD-1 antibody increases TNF- $\alpha$  secretion from Mtb infected cells above isotype, and the detectable levels are suppressed by anti-TNF antibody (50 $\mu$ g/ml).
