# Supplementary material for: Anti-PD-1 immunotherapy leads to tuberculosis reactivation via dysregulation of TNF-α
Source: eLife journal article supplement (doi:10.7554/elife.52668), 2020-02-24
Supplement: supp [file elife_poa_e52668_Figure_5_figure_supplement_1.pdf › elife_poa_e52668_Figure_5_figure_supplement_1.pdf]

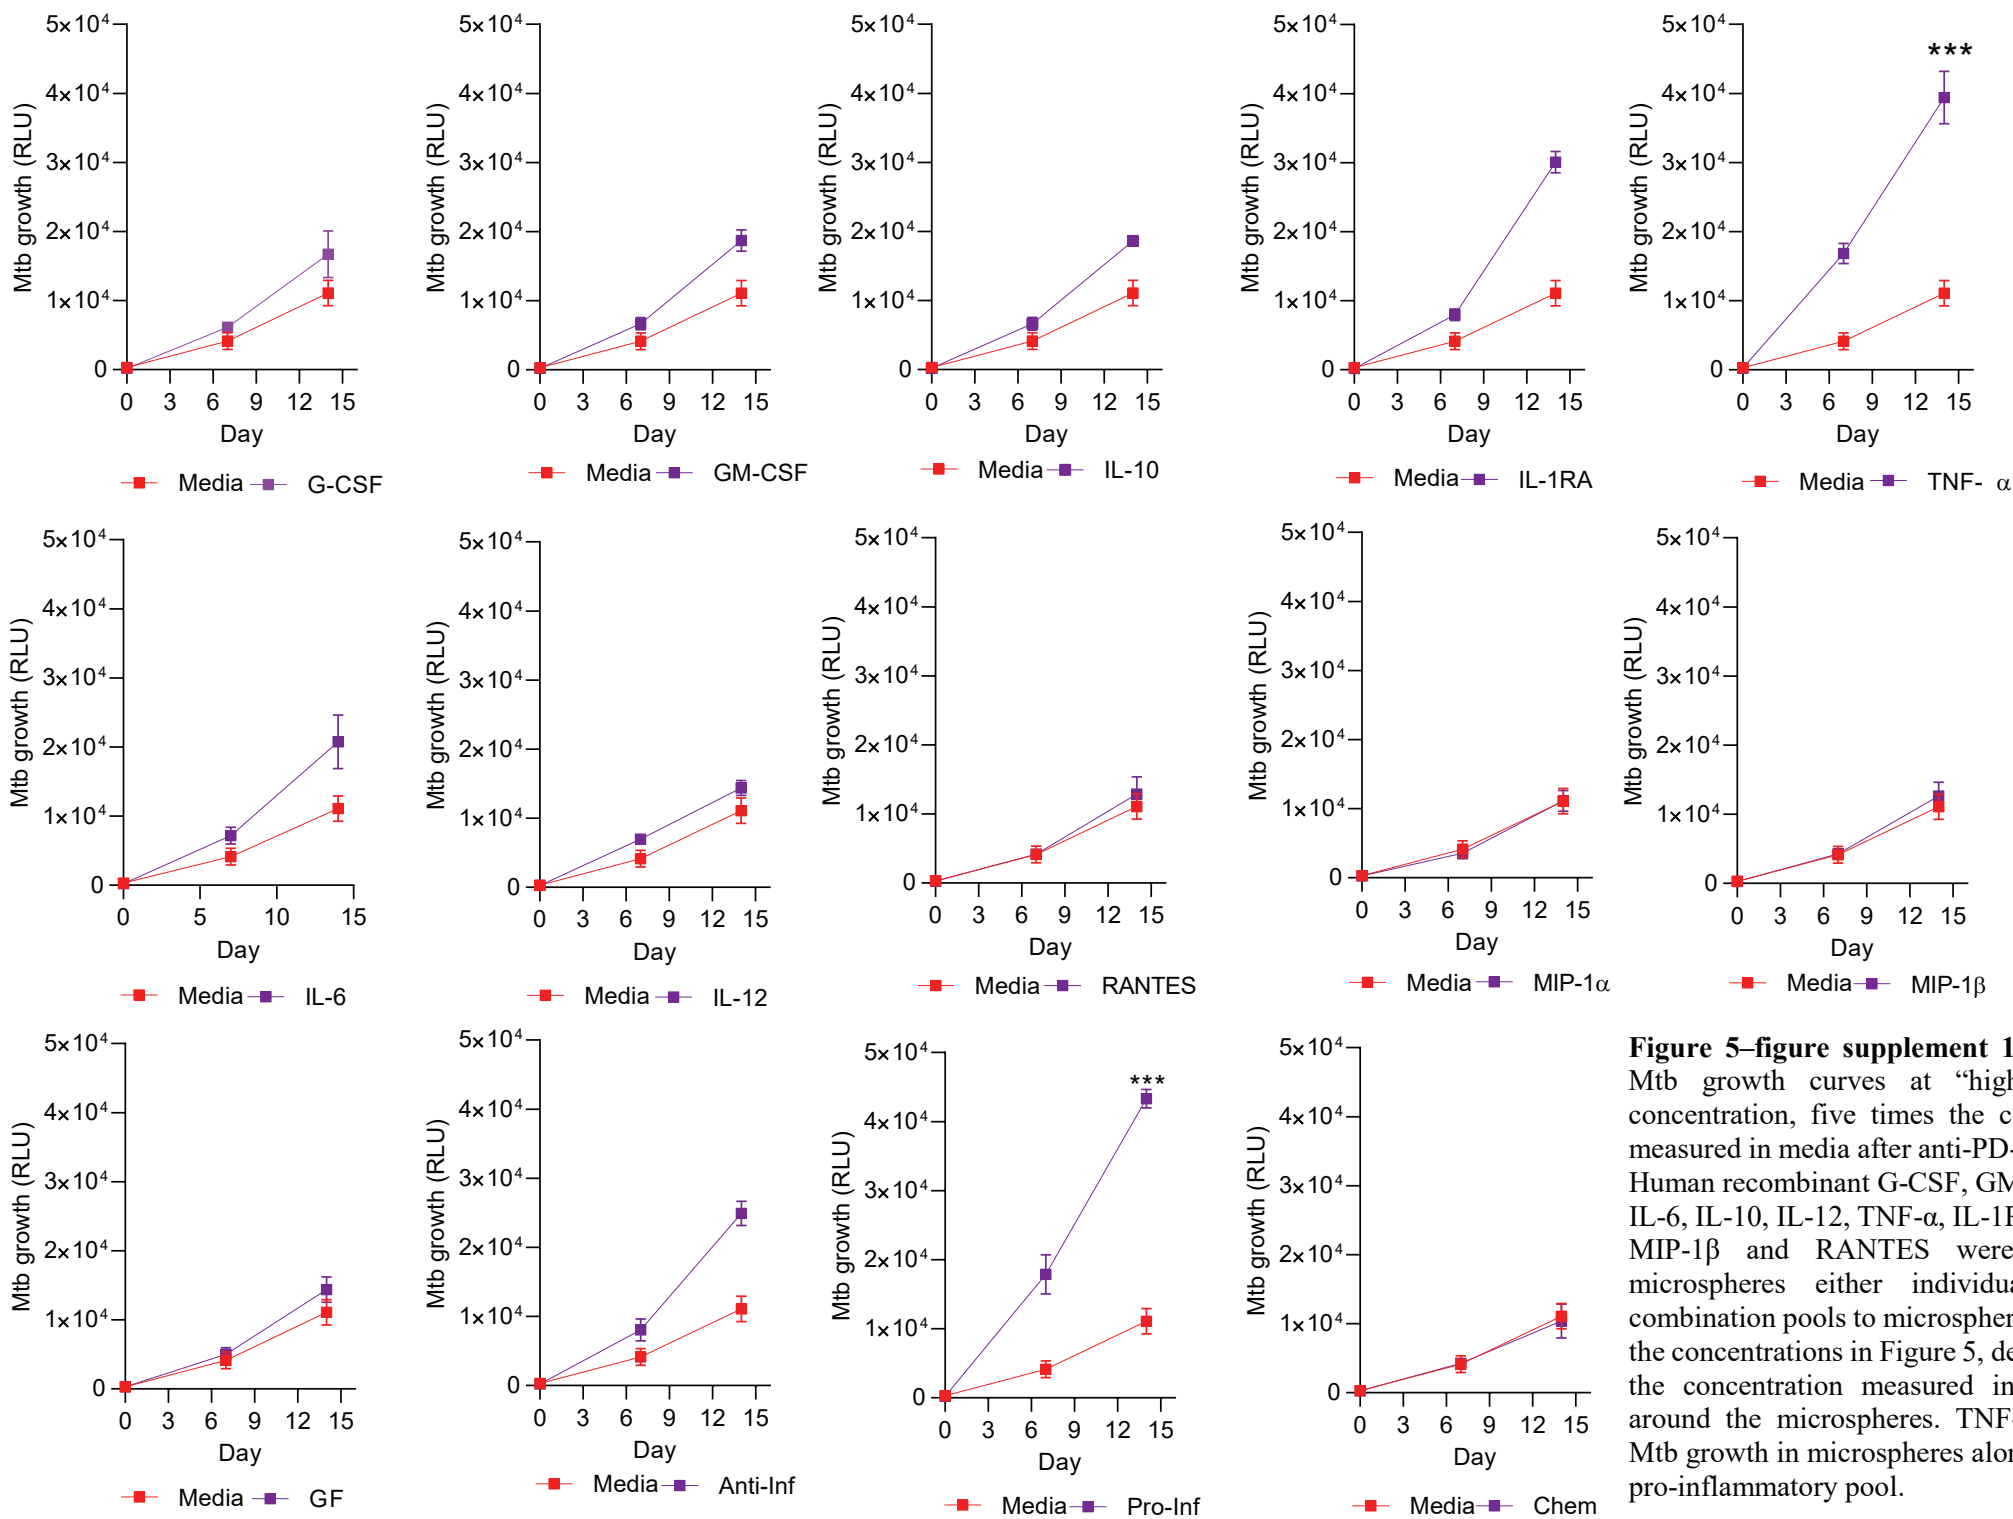

**Figure 5-figure supplement 1:** Individual Mtb growth curves at "high" cytokine concentration, five times the concentration measured in media after anti-PD-1 treatment. Human recombinant G-CSF, GM-CSF, IL-4, IL-6, IL-10, IL-12, TNF- $\alpha$ , IL-1RA, MIP-1 $\alpha$ , MIP-1 $\beta$  and RANTES were added to microspheres either individually or in combination pools to microspheres at 5 times the concentrations in Figure 5, determined by the concentration measured in the media around the microspheres. TNF- $\alpha$  increases Mtb growth in microspheres alone and in the pro-inflammatory pool.
