# Supplementary material for: Anti-PD-1 immunotherapy leads to tuberculosis reactivation via dysregulation of TNF-α
Source: eLife journal article supplement (doi:10.7554/elife.52668), 2020-02-24
Supplement: supp [file elife_poa_e52668_Figure_5_figure_supplement_2.pdf › elife_poa_e52668_Figure_5_figure_supplement_2.pdf]

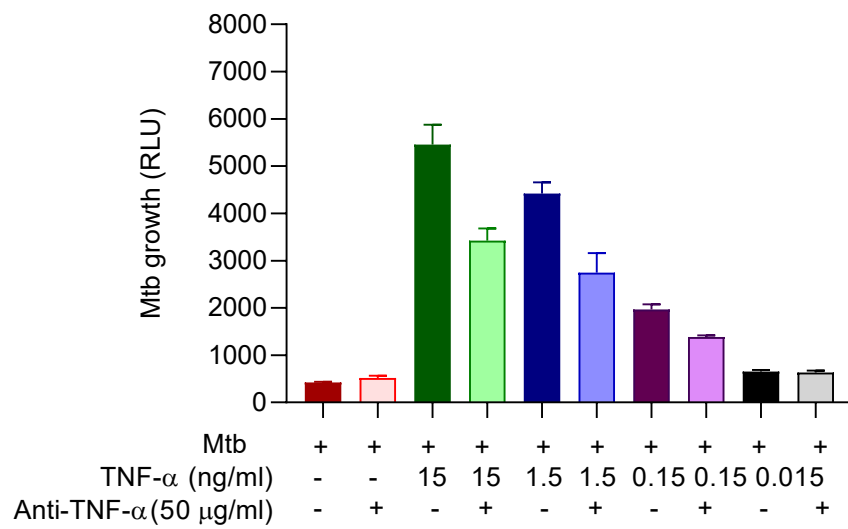

**Figure 5–figure supplement 2:** Anti-TNF- $\alpha$  neutralizing antibodies suppress the Mtb growth following TNF- $\alpha$  from a different source (Anti-TNF- $\alpha$  from Sigma-Aldrich, UK).
