# Supplementary material for: Anti-PD-1 immunotherapy leads to tuberculosis reactivation via dysregulation of TNF-α
Source: eLife. 2020 Feb 24;9:e52668. doi: 10.7554/eLife.52668 (PMC7058383; doi:10.7554/eLife.52668)
Supplement: Supplementary file 1. [file elife-52668-supp1.xlsx]

## Sheet: Sheet1
Supplementary file 1: PD-1 expressing cells for each subset expressed as percentage of live CD45+ cells, with range in parentheses.
		CD103+CD69-	CD103+CD69+	CD103-CD69+	CD103-CD69-
Lung	CD4	0.5886	1.635	8.809	7.571
		(0.0373-1.46)	(0.223-3.82)	(2.15-32.8)	(1.94-17)
	CD8	1.537	10.71	8.891	10.14
		(0.347-4.01)	(1.49-36)	(1.72-21)	(2.3-28.9)
PBMCs	CD4	0.3649	0.02553	1.708	34.01
		(0.157-0.86)	(0.00513-0.151)	(0.0363-5.45)	(13.9-52)
	CD8	0.8811	0.1026	3.157	26.12
		(0.236-3.12)	(0.0059-0.466)	(0.436-9.35)	(7.61-42.9)
